# Supplementary material for: Evaluation of an Automated System for Reading and Interpreting Disk Diffusion Antimicrobial Susceptibility Testing of Fastidious Bacteria
Source: PubMed Central journal article supplement (PMC4938495; doi:10.1371/journal.pone.0159183), 2016-07-08
Supplement: pone.0159183.s001.pdf [file pone.0159183.s001.pdf]

## Evaluation of an Automated System for Reading and Interpreting Disk Diffusion Antimicrobial Susceptibility Testing of

### Fastidious Bacteria

Evgeny A. Idelevich, Karsten Becker, Janne Schmitz, Dennis Knaack, Georg Peters, Robin Köck

**S1 Table.** Susceptibility of isolates determined by manual reading (standard method) and performance of automated reading of disk diffusion antimicrobial susceptibility testing (**without visual adjustment**) for fastidious bacteria, compared to manual reading as standard method, n=144

| Antimicrobial agent               | No. of isolate-<br>antibiotic<br>combinations | No. of<br>resistant<br>isolates <sup>a</sup> | No. of<br>susceptible<br>isolates | No. (%) of<br>very major<br>errors <sup>b</sup> | No. (%) of<br>major<br>errors <sup>b</sup> | No. (%) of<br>minor<br>errors <sup>b</sup> | Categorical<br>agreement, % |
|-----------------------------------|-----------------------------------------------|----------------------------------------------|-----------------------------------|-------------------------------------------------|--------------------------------------------|--------------------------------------------|-----------------------------|
| <b><i>S. agalactiae</i>, n=29</b> | <b>348</b>                                    | <b>31</b>                                    | <b>314</b>                        | <b>3 (9.7)</b>                                  | <b>54 (17.2)</b>                           | <b>3 (0.9)</b>                             | <b>82.8</b>                 |
| Penicillin G                      | 29                                            | 0                                            | 29                                |                                                 |                                            |                                            |                             |
| Levofloxacin                      | 29                                            | 0                                            | 29                                |                                                 | 4                                          |                                            |                             |
| Moxifloxacin                      | 29                                            | 0                                            | 29                                |                                                 | 8                                          |                                            |                             |
| Norfloxacin                       | 29                                            | 0                                            | 29                                |                                                 | 8                                          |                                            |                             |
| Teicoplanin                       | 29                                            | 0                                            | 29                                |                                                 | 3                                          |                                            |                             |

|                                     |            |           |            |                |                  |                |             |
|-------------------------------------|------------|-----------|------------|----------------|------------------|----------------|-------------|
| Vancomycin                          | 29         | 0         | 29         |                |                  |                |             |
| Erythromycin                        | 29         | 7         | 20         | 1              |                  | 2              |             |
| Clindamycin                         | 29         | 4         | 25         | 2              | 6                |                |             |
| Tetracycline                        | 29         | 20        | 8          |                | 7                | 1              |             |
| Tigecycline                         | 29         | 0         | 29         |                | 17               |                |             |
| Linezolid                           | 29         | 0         | 29         |                | 1                |                |             |
| Trimethoprim/<br>sulfamethoxazole   | 29         | 0         | 29         |                |                  |                |             |
| <b><i>S. dysgalactiae</i>, n=14</b> | <b>168</b> | <b>12</b> | <b>152</b> | <b>1 (8.3)</b> | <b>32 (21.1)</b> | <b>4 (2.4)</b> | <b>78.0</b> |
| Penicillin G                        | 14         | 0         | 14         |                |                  |                |             |
| Levofloxacin                        | 14         | 2         | 12         |                | 2                |                |             |
| Moxifloxacin                        | 14         | 0         | 14         |                | 6                |                |             |
| Norfloxacin                         | 14         | 1         | 13         |                | 5                |                |             |
| Teicoplanin                         | 14         | 0         | 14         |                | 3                |                |             |
| Vancomycin                          | 14         | 0         | 14         |                |                  |                |             |
| Erythromycin                        | 14         | 2         | 12         | 1              |                  |                |             |

|                                   |            |          |            |              |                  |                |             |
|-----------------------------------|------------|----------|------------|--------------|------------------|----------------|-------------|
| Clindamycin                       | 14         | 1        | 13         |              | 1                |                |             |
| Tetracycline                      | 14         | 6        | 6          |              | 5                | 2              |             |
| Tigecycline                       | 14         | 0        | 13         |              | 8                | 1              |             |
| Linezolid                         | 14         | 0        | 14         |              | 2                |                |             |
| Trimethoprim/<br>sulfamethoxazole | 14         | 0        | 13         |              |                  | 1              |             |
| <b><i>S. pyogenes, n=25</i></b>   | <b>300</b> | <b>6</b> | <b>293</b> | <b>0 (0)</b> | <b>69 (23.5)</b> | <b>1 (0.3)</b> | <b>76.7</b> |
| Penicillin G                      | 25         | 0        | 25         |              |                  |                |             |
| Levofloxacin                      | 25         | 0        | 25         |              | 5                |                |             |
| Moxifloxacin                      | 25         | 0        | 25         |              | 10               |                |             |
| Norfloxacin                       | 25         | 2        | 23         |              | 9                |                |             |
| Teicoplanin                       | 25         | 0        | 25         |              | 8                |                |             |
| Vancomycin                        | 25         | 0        | 25         |              |                  |                |             |
| Erythromycin                      | 25         | 0        | 24         |              |                  | 1              |             |
| Clindamycin                       | 25         | 0        | 25         |              | 6                |                |             |
| Tetracycline                      | 25         | 4        | 21         |              | 14               |                |             |

|                                   |            |           |            |                 |                  |                |             |
|-----------------------------------|------------|-----------|------------|-----------------|------------------|----------------|-------------|
| Tigecycline                       | 25         | 0         | 25         |                 | 16               |                |             |
| Linezolid                         | 25         | 0         | 25         |                 |                  |                |             |
| Trimethoprim/<br>sulfamethoxazole | 25         | 0         | 25         |                 | 1                |                |             |
| <b><i>S. pneumoniae</i>, n=28</b> | <b>336</b> | <b>29</b> | <b>301</b> | <b>3 (10.3)</b> | <b>50 (16.6)</b> | <b>5 (1.5)</b> | <b>82.7</b> |
| Levofloxacin                      | 28         | 0         | 28         |                 | 10               |                |             |
| Moxifloxacin                      | 28         | 0         | 28         |                 | 9                |                |             |
| Norfloxacin                       | 28         | 1         | 27         | 1               |                  |                |             |
| Teicoplanin                       | 28         | 0         | 28         |                 | 6                |                |             |
| Vancomycin                        | 28         | 0         | 28         |                 | 7                |                |             |
| Erythromycin                      | 28         | 7         | 21         |                 | 3                |                |             |
| Clindamycin                       | 28         | 5         | 23         | 1               | 5                |                |             |
| Tetracycline                      | 28         | 5         | 23         | 1               | 5                |                |             |
| Linezolid                         | 28         | 0         | 28         |                 | 2                |                |             |
| Trimethoprim/<br>sulfamethoxazole | 28         | 4         | 24         |                 | 2                |                |             |

|                                              |            |          |            |                 |                  |                |             |
|----------------------------------------------|------------|----------|------------|-----------------|------------------|----------------|-------------|
| Oxacillin                                    | 28         | 7        | 21         |                 |                  |                |             |
| Cefaclor                                     | 28         | 0        | 22         |                 | 1                | 5              |             |
| <b>Viridans group<br/>streptococci, n=18</b> | <b>126</b> | <b>3</b> | <b>123</b> | <b>0 (0)</b>    | <b>1 (0.8)</b>   | <b>0 (0)</b>   | <b>99.2</b> |
| Penicillin G                                 | 18         | 0        | 18         |                 |                  |                |             |
| Teicoplanin                                  | 18         | 0        | 18         |                 |                  |                |             |
| Vancomycin                                   | 18         | 0        | 18         |                 |                  |                |             |
| Ampicillin                                   | 18         | 0        | 18         |                 |                  |                |             |
| Cefotaxime                                   | 18         | 0        | 18         |                 |                  |                |             |
| Cefuroxime iv <sup>c</sup>                   | 18         | 2        | 16         |                 |                  |                |             |
| Cefepime                                     | 18         | 1        | 17         |                 | 1                |                |             |
| <b><i>H. influenzae</i>, n=13</b>            | <b>156</b> | <b>8</b> | <b>134</b> | <b>7 (87.5)</b> | <b>19 (14.2)</b> | <b>9 (5.8)</b> | <b>77.6</b> |
| Penicillin G                                 | 13         | 2        | 11         | 2               |                  |                |             |
| Levofloxacin                                 | 13         | 0        | 13         |                 | 5                |                |             |
| Erythromycin                                 | 13         | 0        | 0          |                 |                  | 8              |             |

|                                   |           |          |           |              |                  |                |             |
|-----------------------------------|-----------|----------|-----------|--------------|------------------|----------------|-------------|
| Tetracycline                      | 13        | 0        | 13        |              |                  |                |             |
| Trimethoprim/<br>sulfamethoxazole | 13        | 1        | 11        | 1            |                  | 1              |             |
| Ampicillin                        | 13        | 1        | 12        |              |                  |                |             |
| Amoxicillin/clavulanic<br>acid    | 13        | 1        | 12        | 1            | 1                |                |             |
| Cefotaxime                        | 13        | 0        | 13        |              |                  | 1              |             |
| Cefuroxime iv <sup>c</sup>        | 13        | 3        | 10        | 3            | 2                |                |             |
| Meropenem                         | 13        | 0        | 13        |              |                  |                |             |
| Ciprofloxacin                     | 13        | 0        | 13        |              |                  | 2              |             |
| Nalidixic acid                    | 13        | 0        | 13        |              |                  | 8              |             |
| <b><i>M. catarrhalis</i>, n=7</b> | <b>84</b> | <b>1</b> | <b>82</b> | <b>0 (0)</b> | <b>16 (19.5)</b> | <b>1 (1.2)</b> | <b>79.8</b> |
| Levofloxacin                      | 7         | 0        | 7         |              |                  |                |             |
| Moxifloxacin                      | 7         | 0        | 7         |              |                  | 2              |             |
| Erythromycin                      | 7         | 0        | 7         |              |                  |                |             |
| Tetracycline                      | 7         | 0        | 7         |              |                  | 1              |             |

|                                   |             |           |             |                  |                   |                 |             |
|-----------------------------------|-------------|-----------|-------------|------------------|-------------------|-----------------|-------------|
| Trimethoprim/<br>sulfamethoxazole | 7           | 0         | 7           |                  |                   |                 |             |
| Amoxicillin/clavulanic<br>acid    | 7           | 0         | 7           |                  |                   |                 |             |
| Cefotaxime                        | 7           | 0         | 7           |                  | 3                 |                 |             |
| Cefuroxime iv <sup>c</sup>        | 7           | 0         | 7           |                  | 2                 |                 |             |
| Meropenem                         | 7           | 0         | 7           |                  | 5                 |                 |             |
| Ciprofloxacin                     | 7           | 0         | 7           |                  |                   |                 |             |
| Nalidixic acid                    | 7           | 1         | 6           |                  | 2                 |                 |             |
| Cefixime                          | 7           | 0         | 6           |                  | 1                 | 1               |             |
| <b><i>C. jejuni</i>, n=10</b>     | <b>30</b>   | <b>5</b>  | <b>25</b>   | <b>0 (0)</b>     | <b>10 (40)</b>    | <b>0 (0)</b>    | <b>66.7</b> |
| Erythromycin                      | 10          | 0         | 10          |                  | 4                 |                 |             |
| Tetracycline                      | 10          | 2         | 8           |                  | 6                 |                 |             |
| Ciprofloxacin                     | 10          | 3         | 7           |                  |                   |                 |             |
| <b>TOTAL, n=144</b>               | <b>1548</b> | <b>95</b> | <b>1424</b> | <b>14 (14.7)</b> | <b>251 (17.6)</b> | <b>23 (1.5)</b> | <b>81.4</b> |

---

<sup>a</sup> Number of results within intermediate category can be calculated by subtracting resistant and susceptible results from the number of isolate-antibiotic combinations tested

<sup>b</sup> Error rates are reported as required by the ISO 20776-2 guideline: VME (%), number of VMEs (i.e. false susceptible results) divided by the number of isolates determined resistant by the standard method; ME (%), number of MEs (i.e. false resistant results) divided by the number of isolates determined susceptible by the standard method); mE (%), number of mEs (i.e. false categorization involving intermediate result) divided by the total number of tested isolates; Categorical agreement (i.e. results within the same interpretative category)

<sup>c</sup> iv, interpretation according to breakpoints for intravenous use
